# Supplementary material
Source: publisher site journal article supplement (https://vertebrate-zoology.arphahub.com/article/78830/download/suppl/31/)
Supplement: Supplementary file 1

**Supplementary Table S1.** Summary of uncorrected pairwise distances between species in the subgenus Laurentomantis. For each pairwise between-species comparison, the minimum and maximum value from pairwise comparisons between individuals is reported. Cells marked in green report values of intra-specific distances (i.e., distances between individual sequences assigned to the same species, minimum and maximum). Yellow cells mark comparisons between lineages A–D, corresponding to the four new species described in this study.

|  | *G. horridus* | *G. ranjo­mavo* | *G. ma­tsilo* **sp. nov.** (A) | *G. fiha­rimpe* **sp. nov.** (B) | *G. oel­krugi* **sp. nov.** (C) | *G. por­tonae* **sp. nov.** (D) | *G. stria­tus* | *G. mala­gasius* |
| --- | --- | --- | --- | --- | --- | --- | --- | --- |
| *G. horridus* | 0 |  |  |  |  |  |  |  |
| *G. ranjomavo* | 0.06693–0.08268 | 0.02953–0.04921 |  |  |  |  |  |  |
| *G. matsilo* **sp. nov.**  (A) | 0.1008–0.1166 | 0.08103–0.1107 | 0–0.03156 |  |  |  |  |  |
| *G. fiharimpe* **sp. nov.** (B) | 0.1026–0.1105 | 0.09073–0.1105 | 0.03945–0.05731 | 0–0.01772 |  |  |  |  |
| *G. oelkrugi* **sp. nov.**  (C) | 0.1028–0.1067 | 0.09091–0.1028 | 0.04331–0.05545 | 0.04339–0.05545 | 0–0.01383 |  |  |  |
| *G. portonae* **sp. nov.** (D) | 0.1028–0.1126 | 0.09289–0.1067 | 0.05906–0.07298 | 0.06114–0.08087 | 0.05128–0.0751 | 0.001969–0.03937 |  |  |
| *G. striatus* | 0.07495–0.08087 | 0.07495–0.08876 | 0.08087–0.08893 | 0.08071–0.09055 | 0.07723–0.08679 | 0.0789–0.08481 | 0.001969–0.005906 |  |
| *G. malagasius* | 0.08481–0.09073 | 0.08284–0.1045 | 0.07298–0.08087 | 0.06496–0.07874 | 0.06324–0.08119 | 0.06509–0.08087 | 0.0748–0.07874 | 0.01575–0.01575 |
